# Supplementary material for: Quantitative assessment of the influence of EPHX1 gene polymorphisms and cancer risk: a meta-analysis with 94,213 subjects
Source: PubMed Central journal article supplement (PMC4189664; doi:10.1186/s13046-014-0082-9), 2014-09-28
Supplement: 13046_2014_82_MOESM2_ESM.pdf [file 13046_2014_82_MOESM2_ESM.pdf]

**Table S2. Principal characteristics of the studies included on EPHX1 Tyr113His polymorphism.**

| First Author            | Year | Country  | Ethnicity | Cancer Type              | Source of | Genotypes distribution |                |         | HWE  |    |
|-------------------------|------|----------|-----------|--------------------------|-----------|------------------------|----------------|---------|------|----|
|                         |      |          |           |                          |           | Control                | (case/control) |         |      |    |
|                         |      |          |           |                          |           |                        | TT             | TC      |      | CC |
| Conesa-Zamora           | 2013 | Spain    | Caucasian | lymphoma                 | PB        | 118/113                | 71/83          | 17/18   | 0.62 |    |
| Catsburg                | 2012 | USA      | Mixed     | prostate cancer          | PB        | 716/400                | 541/295        | 125/52  | 0.81 |    |
| Dura                    | 2012 | Holland  | Caucasian | esophageal cancer        | PB        | 178/295                | 136/228        | 30/58   | 0.16 |    |
| Nisa                    | 2013 | Japan    | Asian     | colorectal cancer        | PB        | 228/239                | 342/396        | 115/143 | 0.35 |    |
| Jang                    | 2012 | Canada   | Mixed     | pancreatic cancer        | PB        | 217/432                | 192/374        | 42/78   | 0.82 |    |
| Ihsan                   | 2011 | India    | Asian     | lung cancer              | HB        | 82/94                  | 51/133         | 55/63   | 0.22 |    |
| Bonaventure             | 2011 | France   | Caucasian | childhood acute leukemia | PB        | 255/263                | 197/190        | 41/32   | 0.77 |    |
| Sivonova                | 2012 | Slovak   | Caucasian | prostate cancer          | PB        | 86/129                 | 94/140         | 14/36   | 0.83 |    |
| Tumer                   | 2012 | Turkey   | Asian     | childhood ALL            | PB        | 89/110                 | 47/62          | 31/17   | 0.06 |    |
| Tilak                   | 2011 | India    | Asian     | lung cancer              | PB        | 62/134                 | 85/157         | 28/31   | 0.12 |    |
| Wang                    | 2012 | USA      | Mixed     | colorectal cancer        | FB        | 167/188                | 108/141        | 28/29   | 0.72 |    |
| Balaji                  | 2011 | India    | Asian     | oral cancer              | HB        | 71/49                  | 61/64          | 25/19   | 0.8  |    |
| Cleary                  | 2010 | Canada   | Caucasian | colorectal cancer        | PB        | 561/625                | 502/549        | 100/118 | 0.87 |    |
| Hlavata                 | 2010 | Czech    | Caucasian | colorectal cancer        | HB        | 221/231                | 224/212        | 50/52   | 0.75 |    |
| Chauhan                 | 2011 | India    | Asian     | Adult AML                | PB        | 50/77                  | 48/85          | 22/40   | 0.07 |    |
| Ihsan                   | 2010 | India    | Asian     | esophageal cancer        | PB        | 55/55                  | 49/96          | 38/34   | 0.48 |    |
| Soucek                  | 2010 | Czech    | Caucasian | HNC                      | PB        | 60/53                  | 42/48          | 14/12   | 0.82 |    |
| Timofeeva               | 2010 | Germany  | Caucasian | lung cancer              | PB        | 316/627                | 238/520        | 57/119  | 0.46 |    |
| MARIE-GENICA Consortium | 2010 | Germany  | Caucasian | breast cancer            | PB        | 1535/2671              | 1345/2322      | 267/490 | 0.65 |    |
| Sangrajrang             | 2009 | Thailand | Asian     | breast cancer            | HB        | 143/125                | 286/247        | 128/115 | 0.74 |    |
| Ockenga                 | 2009 | Germany  | Caucasian | pancreatic cancer        | PB        | 167/304                | 164/311        | 36/64   | 0.22 |    |
| Jain                    | 2008 | India    | Asian     | esophageal cancer        | PB        | 28/133                 | 66/156         | 13/31   | 0.13 |    |
| Lacko                   | 2008 | Holland  | Caucasian | HNC                      | PB        | 206/196                | 180/185        | 43/38   | 0.55 |    |
| Rosenberger             | 2008 | Germany  | Caucasian | lung cancer              | PB        | 55/49                  | 38/43          | 7/8     | 0.74 |    |
| Srivastava              | 2008 | India    | Asian     | bladder cancer           | unknown   | 26/78                  | 57/64          | 23/18   | 0.38 |    |
| Skjelbred               | 2007 | Norway   | Caucasian | colorectal cancer        | PB        | 52/132                 | 41/134         | 9/33    | 0.91 |    |
| Mittal                  | 2007 | India    | Asian     | prostate cancer          | unknown   | 26/62                  | 67/60          | 37/18   | 0.56 |    |
| Justenhoven             | 2008 | Germany  | Caucasian | breast cancer            | PB        | 296/295                | 246/269        | 63/45   | 0.12 |    |
| De Roos                 | 2006 | USA      | Mixed     | NHL                      | PB        | 528/469                | 471/383        | 104/69  | 0.45 |    |
| De Roos                 | 2006 | USA      | Mixed     | brain cancer             | HB        | 313/268                | 213/216        | 69/43   | 0.95 |    |
| Clavel                  | 2005 | France   | Mixed     | childhood leukemia       | HB        | 120/49                 | 73/39          | 25/17   | 0.06 |    |
| van der Logt            | 2006 | Holland  | Caucasian | colorectal cancer        | PB        | 185/194                | 141/165        | 39/32   | 0.71 |    |
| Landi                   | 2005 | Spain    | Caucasian | colorectal cancer        | HB        | 177/168                | 153/126        | 33/29   | 0.45 |    |
| Voho                    | 2006 | Finland  | Caucasian | lung cancer              | PB        | 133/1029               | 81/865         | 13/189  | 0.71 |    |
| Tranah                  | 2005 | USA      | Caucasian | colorectal cancer        | PB        | 219/439                | 190/371        | 34/81   | 0.84 |    |
| Robien                  | 2005 | USA      | Mixed     | colorectal cancer        | PB        | 789/991                | 655/795        | 149/174 | 0.42 |    |

|             |      |           |           |                  |    |         |         |       |      |
|-------------|------|-----------|-----------|------------------|----|---------|---------|-------|------|
| Sarmanová   | 2004 | Czech     | Caucasian | breast cancer    | HB | 115/148 | 77/124  | 45/39 | 0.11 |
| Gsur        | 2003 | Austria   | Caucasian | lung cancer      | HB | 147/224 | 114/218 | 16/54 | 0.93 |
| Wenghoefer  | 2003 | Germany   | Caucasian | HNC              | HB | 142/136 | 112/128 | 26/25 | 0.51 |
| Soucek      | 2002 | Czech     | Caucasian | lymphoma         | PB | 60/74   | 33/90   | 19/39 | 0.22 |
| To-Figueras | 2002 | Spain     | Caucasian | laryngeal cancer | PB | 106/93  | 83/94   | 15/16 | 0.24 |
| Spurdle     | 2001 | Australia | Caucasian | ovarian cancer   | PB | 255/142 | 233/114 | 57/31 | 0.26 |
| London      | 2000 | USA       | Caucasian | lung cancer      | PB | 85/237  | 82/184  | 15/37 | 0.88 |
| London      | 2000 | USA       | African   | lung cancer      | PB | 106/153 | 48/77   | 1/12  | 0.57 |
| Benhamou    | 1998 | France    | Caucasian | lung cancer      | HB | 82/64   | 46/77   | 22/31 | 0.26 |

PB: population based; HB: hospital based; FB: family based

HWE: Hardy-Weinberg equilibrium (significant at the 0.05 level)

ALL: acute lymphoblastic leukemia; AML: acute myelocytic leukemia; HNC: head and neck cancer; NHL: Non Hodgkin lymphoma.
