# Supplementary material for: Quantitative assessment of the influence of EPHX1 gene polymorphisms and cancer risk: a meta-analysis with 94,213 subjects
Source: PubMed Central journal article supplement (PMC4189664; doi:10.1186/s13046-014-0082-9), 2014-09-28

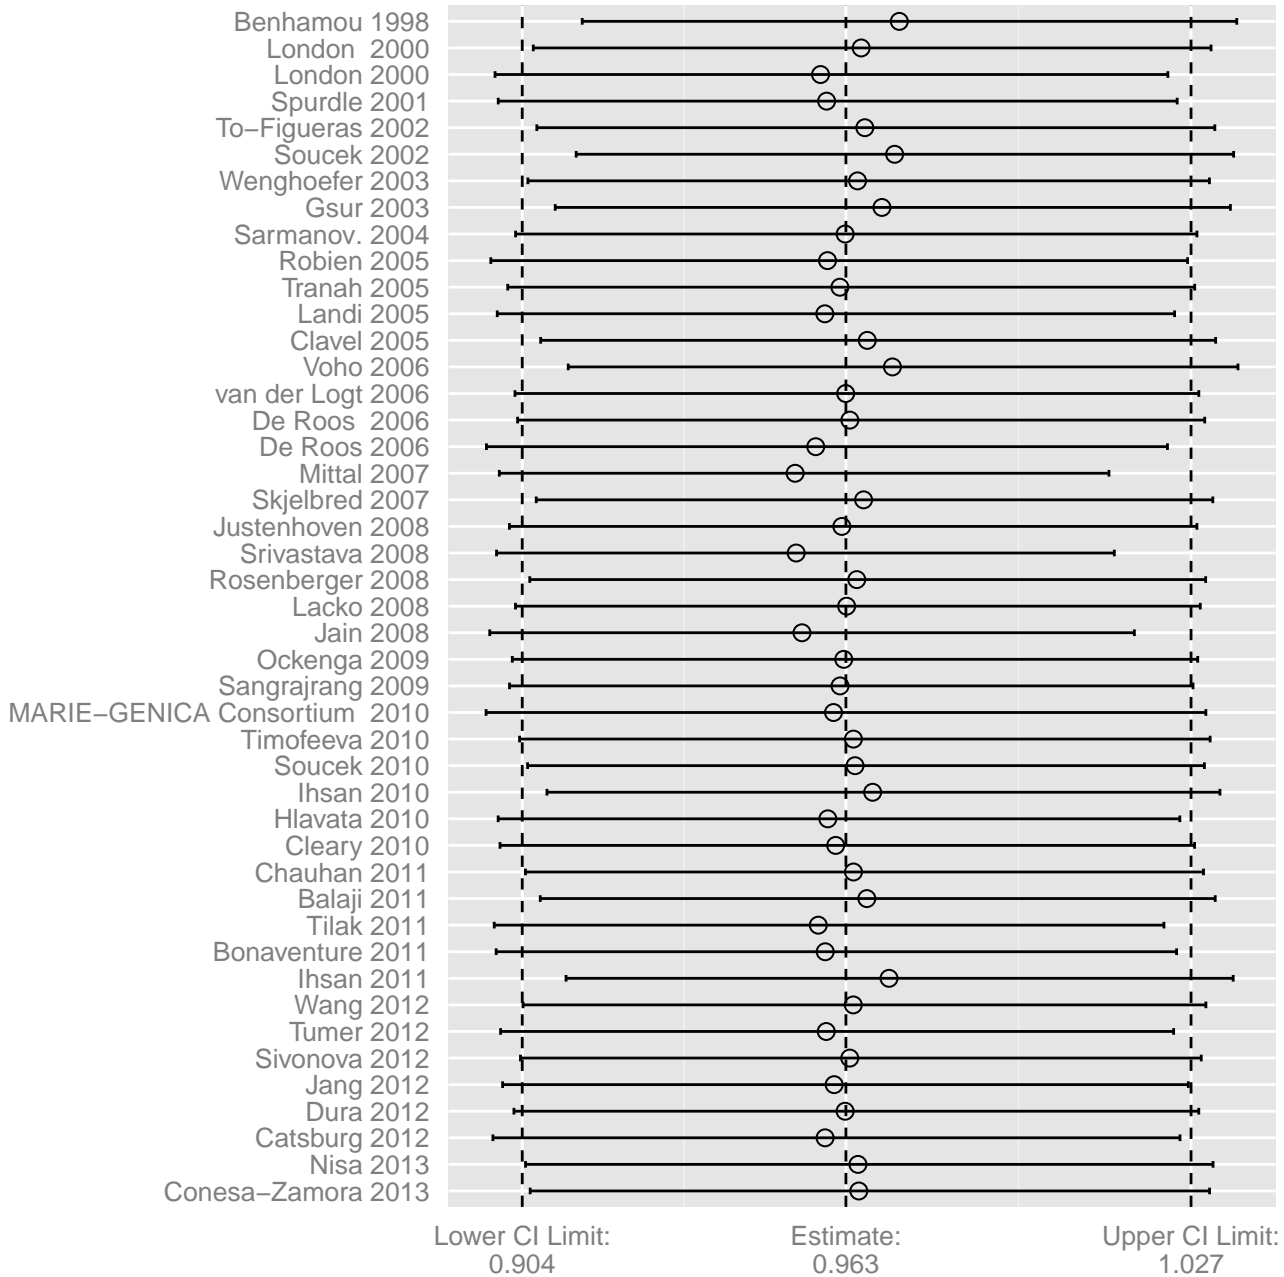

Supplement: 13046_2014_82_MOESM4_ESM.pdf [file 13046_2014_82_MOESM4_ESM.pdf]
