# Supplementary material for: Quantitative assessment of the influence of EPHX1 gene polymorphisms and cancer risk: a meta-analysis with 94,213 subjects
Source: Springer Nature journal article supplement (doi:10.1186/s13046-014-0082-9), 2014-09-28
Supplement: MOESM3 [file 9777734]

**Table S3. Principal characteristics of the studies included on EPHX1 His139Arg polymorphism.**

| First Author | Year | Country    | Ethnicity | Cancer Type              | Source of | Genotypes distribution |                |       | HWE  |    |
|--------------|------|------------|-----------|--------------------------|-----------|------------------------|----------------|-------|------|----|
|              |      |            |           |                          |           | Control                | (case/control) |       |      |    |
|              |      |            |           |                          |           |                        | AA             | AG    |      | GG |
| Chung        | 2013 | China      | Asian     | urothelial cancer        | HB        | 146/290                | 39/66          | 3/7   | 0.17 |    |
| Chauhan      | 2012 | India      | Asian     | acute leukemia           | PB        | 141/127                | 80/64          | 9/8   | 0.99 |    |
| Dura         | 2012 | Holland    | Caucasian | esophageal cancer        | PB        | 222/364                | 111/187        | 11/25 | 0.87 |    |
| Nisa         | 2013 | Japan      | Asian     | colorectal cancer        | PB        | 485/525                | 182/224        | 18/29 | 0.41 |    |
| Jang         | 2012 | Canada     | Mixed     | pancreatic cancer        | PB        | 296/566                | 135/280        | 20/36 | 0.85 |    |
| Ihsan        | 2011 | India      | Asian     | lung cancer              | HB        | 121/212                | 59/70          | 8/8   | 0.45 |    |
| Bonaventure  | 2011 | France     | Caucasian | childhood acute leukemia | PB        | 340/331                | 135/178        | 18/19 | 0.41 |    |
| Sivonova     | 2012 | Slovak     | Caucasian | prostate cancer          | PB        | 124/220                | 62/76          | 8/9   | 0.44 |    |
| Tumer        | 2012 | Turkey     | Asian     | childhood ALL            | PB        | 120/131                | 43/55          | 4/4   | 0.52 |    |
| Tilak        | 2011 | India      | Asian     | lung cancer              | PB        | 103/187                | 62/117         | 10/18 | 0.96 |    |
| Balaji       | 2011 | India      | Asian     | oral cancer              | HB        | 91/77                  | 58/50          | 8/5   | 0.37 |    |
| Hlavata      | 2010 | Czech      | Caucasian | colorectal cancer        | HB        | 297/290                | 173/183        | 25/22 | 0.31 |    |
| Chauhan      | 2011 | India      | Asian     | Adult AML                | PB        | 75/115                 | 38/78          | 7/9   | 0.35 |    |
| Ihsan        | 2010 | India      | Asian     | esophageal cancer        | PB        | 87/138                 | 48/45          | 7/2   | 0.43 |    |
| Soucek       | 2010 | Czech      | Caucasian | HNC                      | PB        | 71/77                  | 40/41          | 5/4   | 0.6  |    |
| Timofeeva    | 2010 | Germany    | Caucasian | lung cancer              | PB        | 378/754                | 212/361        | 23/45 | 0.83 |    |
| Gold         | 2009 | USA        | Mixed     | multiple myeloma         | PB        | 165/452                | 84/248         | 11/36 | 0.79 |    |
| Silveira     | 2009 | Brazil     | Mixed     | ALL                      | HB        | 78/210                 | 44/77          | 3/13  | 0.09 |    |
| Rotunno      | 2009 | Italy      | Caucasian | lung cancer              | PB        | 1240/1316              | 567/628        | 51/82 | 0.52 |    |
| Sangrajrang  | 2009 | Thailand   | Asian     | breast cancer            | HB        | 404/353                | 147/128        | 11/8  | 0.35 |    |
| Figueroa     | 2008 | Spain      | Caucasian | bladder cancer           | HB        | 720/662                | 319/312        | 48/37 | 0.97 |    |
| Jain         | 2008 | India      | Asian     | esophageal cancer        | PB        | 71/187                 | 29/116         | 7/17  | 0.86 |    |
| Lacko        | 2008 | Holland    | Caucasian | HNC                      | PB        | 286/269                | 123/135        | 20/15 | 0.7  |    |
| Rosenberger  | 2008 | Germany    | Caucasian | lung cancer              | PB        | 68/69                  | 29/27          | 4/3   | 0.86 |    |
| Zienolddiny  | 2008 | Norway     | Caucasian | lung cancer              | PB        | 120/201                | 153/128        | 45/32 | 0.08 |    |
| Srivastava   | 2008 | India      | Asian     | bladder cancer           | unknown   | 66/92                  | 36/55          | 4/13  | 0.25 |    |
| Skjelbred    | 2007 | Norway     | Caucasian | colorectal cancer        | PB        | 56/190                 | 27/90          | 18/19 | 0.07 |    |
| Mittal       | 2007 | India      | Asian     | prostate cancer          | unknown   | 74/78                  | 49/49          | 7/13  | 0.2  |    |
| Kiss         | 2007 | Hungary    | Caucasian | colorectal cancer        | PB        | 337/329                | 157/161        | 6/10  | 0.05 |    |
| Boccia       | 2008 | Italy      | Caucasian | HNC                      | HB        | 144/151                | 59/88          | 7/6   | 0.1  |    |
| Justenhoven  | 2008 | Germany    | Caucasian | breast cancer            | PB        | 391/388                | 182/213        | 28/23 | 0.35 |    |
| Agudo        | 2006 | EPIC study | Caucasian | gastric cancer           | PB        | 156/615                | 76/289         | 10/40 | 0.41 |    |
| De Roos      | 2006 | USA        | Mixed     | NHL                      | PB        | 705/571                | 345/304        | 41/41 | 0.95 |    |
| Clavel       | 2005 | France     | Mixed     | childhood leukemia       | HB        | 141/62                 | 67/41          | 11/2  | 0.1  |    |
| van der Logt | 2006 | Holland    | Caucasian | colorectal cancer        | PB        | 241/269                | 106/128        | 24/17 | 0.72 |    |
| Landi        | 2005 | Spain      | Caucasian | colorectal cancer        | HB        | 250/225                | 98/85          | 13/11 | 0.4  |    |

|             |      |           |           |                          |    |           |         |       |      |
|-------------|------|-----------|-----------|--------------------------|----|-----------|---------|-------|------|
| Voho        | 2006 | Finland   | Caucasian | lung cancer              | PB | 179/1408  | 48/608  | 0/62  | 0.71 |
| Tranah      | 2005 | USA       | Caucasian | colorectal cancer        | PB | 314/581   | 117/273 | 13/30 | 0.76 |
| Park        | 2005 | USA       | Mixed     | lung cancer              | HB | 121/234   | 54/118  | 7/11  | 0.4  |
| Robien      | 2005 | USA       | Mixed     | colorectal cancer        | PB | 1051/1267 | 479/605 | 63/88 | 0.15 |
| Sarmanová   | 2004 | Czech     | Caucasian | breast cancer            | HB | 147/180   | 83/115  | 8/15  | 0.54 |
| Tranah      | 2004 | USA       | Caucasian | colorectal cancer        | PB | 584/789   | 275/406 | 42/40 | 0.16 |
| Gsur        | 2003 | Austria   | Caucasian | lung cancer              | HB | 186/336   | 80/144  | 11/16 | 0.91 |
| Wenghoefer  | 2003 | Germany   | Caucasian | HNC                      | HB | 177/174   | 91/106  | 12/9  | 0.13 |
| To-Figueras | 2002 | Spain     | Caucasian | laryngeal cancer         | PB | 145/134   | 56/62   | 3/7   | 0.96 |
| Zhao        | 2002 | USA       | Caucasian | lung cancer              | PB | 94/105    | 62/46   | 10/6  | 0.73 |
| Baxter      | 2002 | Australia | Caucasian | ovarian cancer           | HB | 193/152   | 82/92   | 16/13 | 0.85 |
| To-Figueras | 2001 | Spain     | Caucasian | lung cancer              | PB | 119/126   | 53/54   | 3/7   | 0.69 |
| Tiemersma   | 2001 | Sudan     | African   | hepatocellular<br>cancer | PB | 63/102    | 44/69   | 3/13  | 0.78 |
| Sarmanová   | 2001 | Czech     | Caucasian | lymphoma                 | PB | 153/290   | 64/140  | 7/23  | 0.26 |
| London      | 2000 | USA       | Caucasian | lung cancer              | PB | 125/302   | 50/136  | 7/20  | 0.35 |
| London      | 2000 | USA       | African   | lung cancer              | PB | 70/119    | 70/105  | 15/18 | 0.43 |
| Harrison    | 1999 | UK        | Caucasian | colorectal cancer        | PB | 76/147    | 21/53   | 4/3   | 0.47 |
| Benhamou    | 1998 | France    | Caucasian | lung cancer              | HB | 94/121    | 53/49   | 3/2   | 0.22 |

EPIC study: Denmark, France, Germany, Greece, Italy, the Netherlands, Norway, Spain, Sweden, and the United Kingdom.

PB: population based; HB: hospital based.

HWE: Hardy-Weinberg equilibrium (significant at the 0.05 level).

ALL: acute lymphoblastic leukemia; AML: acute myelocytic leukemia; HNC: head and neck cancer; NHL: Non Hodgkin lymphoma.
