# Supplementary material for: Quantitative assessment of the influence of EPHX1 gene polymorphisms and cancer risk: a meta-analysis with 94,213 subjects
Source: Springer Nature journal article supplement (doi:10.1186/s13046-014-0082-9), 2014-09-28

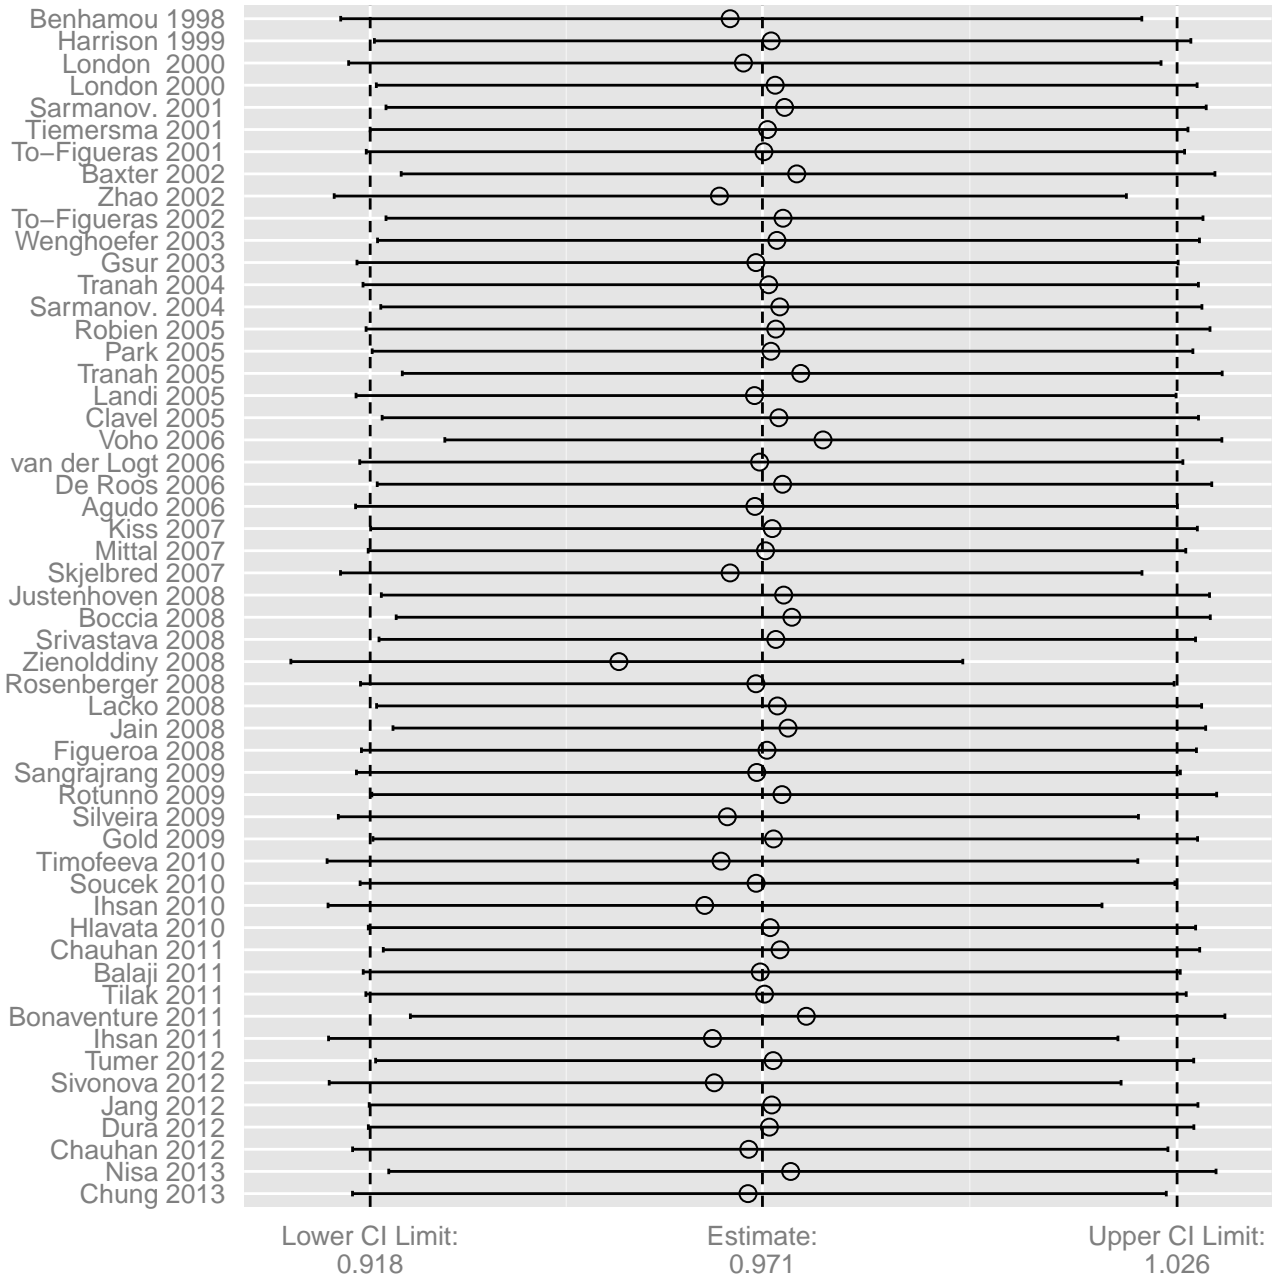

Supplement: MOESM5 [file 9777734]
